# Supplementary material for: Upregulation of WDR6 drives hepatic de novo lipogenesis in insulin resistance in mice
Source: PubMed Central journal article supplement (PMC10590755; doi:10.1038/s42255-023-00896-7), 2023-09-21
Supplement: 42255_2023_896_MOESM1_ESM.pdf [file 42255_2023_896_MOESM1_ESM.pdf]

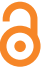

---

# Upregulation of WDR6 drives hepatic de novo lipogenesis in insulin resistance in mice

---

In the format provided by the authors and unedited

## **Supplementary Materials and Methods**

### **Serum parameter measurements**

FPG and serum levels of lipid profiles, ALT, AST, BUN, and creatinine were determined using enzymatic methods with an Auto Biochemical Analyzer (AU5400, Olympus). Serum insulin levels were measured using Mouse insulin ELISA kit (csb-e05071m; CUSABIO). All steps were performed in strict accordance with the manufacturer's instructions.  $HOMA-IR = FPG \text{ (mmol/L)} \times \text{fasting insulin levels (mIU/L)} / 22.5$ .

### **TAG contents in liver tissue and primary hepatocytes**

TAG in liver tissue and primary hepatocytes was extracted and assayed in strict accordance with the Triglyceride content assay kit (E1013; Applygen Technologies) manufacturer's instructions. The contents of TAG were normalized to those of the protein content or tissue weight in the same sample.

### **Oil Red O staining**

Liver tissues were fixed in the OCT-Freeze medium and then cut into 10  $\mu\text{m}$  thick sections. For oil red O staining, frozen sections or primary hepatocytes were fixed with 4% paraformaldehyde for 30 min before staining with Oil Red O solution (G1015; Servicebio) according to the manufacturer's instructions. Picture acquisition was done using LAS V4.9.

### **Hematoxylin & eosin (H&E) and Picrosirius red staining**

Liver tissues were fixed in 4% paraformaldehyde, dehydrated, embedded in paraffin, cut into 5  $\mu\text{m}$  thick sections. Then, the paraffin sections were stained with hematoxylin (G1004; Servicebio), eosin solution (G1002; Servicebio) or picrosirius red (365548, Sigma-Aldrich) according to the manufacturer's instructions. Picture acquisition was done using LAS V4.9.

### **Reactome pathway and Gene Ontology (GO) enrichment analysis**

Reactome pathway analysis was performed using ReactomePA (1.36.0) and GO analysis was run using clusterProfiler (4.0.5). Pathways with a *P* value less than 0.05 were defined as enriched with significance.

### **siRNA transfection**

siRNAs targeting *INSR*, *PPP1CA*, *PPP1CB* and *PPP1CC* were designed according to the common sequences in both humans and mice. The targeting sequence for *INSR* was 5'-GAACAATGTTGTACACTTATT-3'. The targeting sequence for *PPP1CA* was 5'-GAGAAGATACAACATCAAA-3'. The targeting sequence for *PPP1CB* was 5'-GCCTATAGCTGCTATTGTT-3'. The targeting sequence for *PPP1CC* was 5'-GCAAGAATGTCCAGCTCCA-3'. Lipofectamine 3000 reagent (L3000015; Invitrogen) was used for transfection according to the manufacturer's instructions. After 48 h, the cells were collected for further analysis.

### **Plasmid construction**

Plasmids encoding full-length, mutant or truncated human PPP1CB-FLAG, HA-PPP1CB, WDR6-FLAG or HA-WDR6 were obtained by cloning the corresponding cDNA into the pcDNA3.1-Flag or pcDNA3.1-HA backbones, respectively. Primer sequences for overexpressing plasmid construction are listed in Supplementary Data 8.

### **RNA isolation and real-time quantitative RT-PCR**

The total RNA extraction procedure has been described previously<sup>1</sup>. RNA concentration was determined by Nanodrop2000. The real-time PCR was performed by SYBR Green (11201ES08; Yeasen Biotechnology) on LightCycler480 Software (Roche) according to the manufacturer's instructions. *Actb* or *Acta1* were utilized as internal controls for normalization. Each sample was analyzed in triplicates, and all data were analyzed relative to the controls. Primer sequences for RT-PCR are listed in Supplementary Data 9.

### **Protein extraction and Western blots**

Cells and tissues were solubilized in RIPA buffer (MA0151; Meilunbio) containing phosphatase inhibitor cocktail (B15001; Bimake) and protease inhibitor cocktail (R0092-010; ShenergyBiocolor Bioscience) according to the manufacturer's instructions. The protein concentration was determined using BCA Protein Assay Kit (23225; Thermo Scientific). Equal amounts of protein from different

samples were subjected to 6%-12% SDS-PAGE, followed by electro-transfer to polyvinylidene difluoride (PVDF) membranes (IPVH00010; Merck Millipore).  $\beta$ -ACTIN or GAPDH was utilized as an internal control for normalization. Immune complexes were detected using Amersham Imager 680. Protein quantitative analysis was applied by measuring bands densitometry using AlphaView 3.2.2. The phosphorylated protein levels were normalized to the respective 'total' protein levels, while the others were normalized to the internal control. Antibodies for western blot are listed in Supplementary Data 10.

## **Reference**

1. Wang X, et al. Cyclophilin D deficiency attenuates mitochondrial perturbation and ameliorates hepatic steatosis. *Hepatology* 68, 62-77 (2018).

Supplementary Data 1

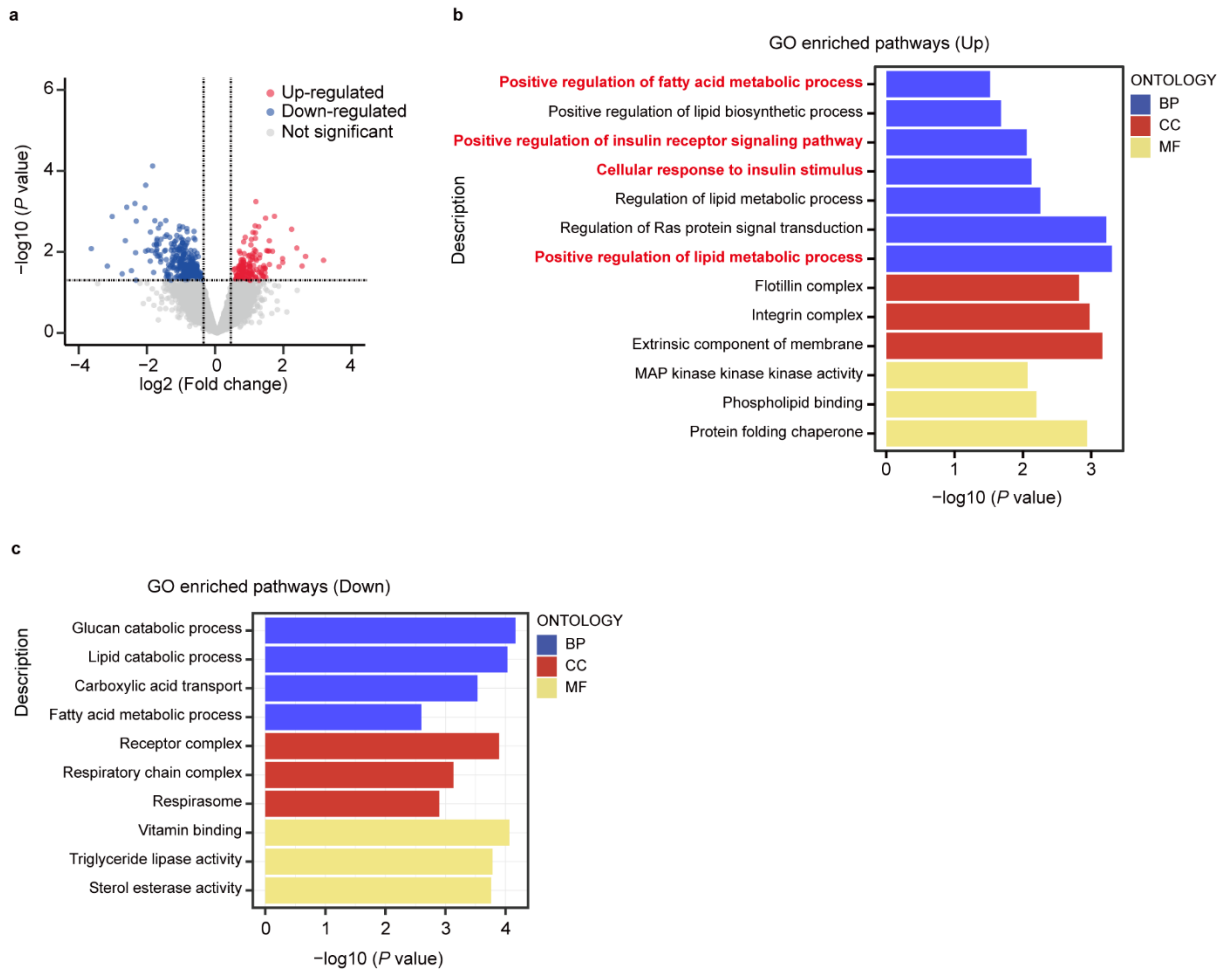

**Supplementary Data 1 | Transcriptomic analysis of genes in livers differentially expressed in response to insulin stimulation during IR, related to Fig. 1.**

**a**, A volcano plot showing differentially expressed genes (red, upregulated genes; blue, downregulated genes; gray, not significantly changed) in insulin group vs. vehicle group. **b**, GO enrichment analysis of up-regulated genes in insulin group vs. vehicle group. **c**, GO enrichment analysis of down-regulated genes in insulin group vs. vehicle group. For (a-c), n = 3 biologically independent mice per group.

Supplementary Data 2

a

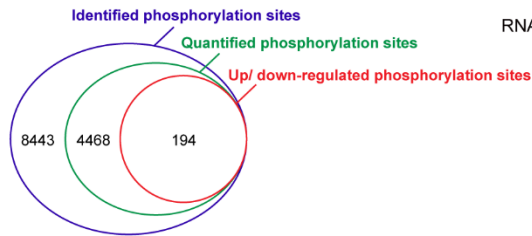

b

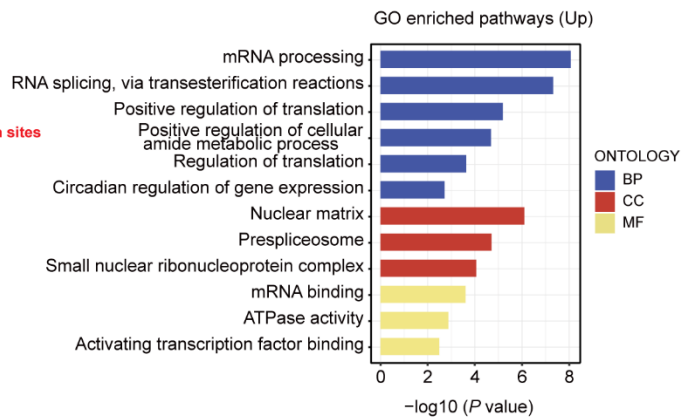

c

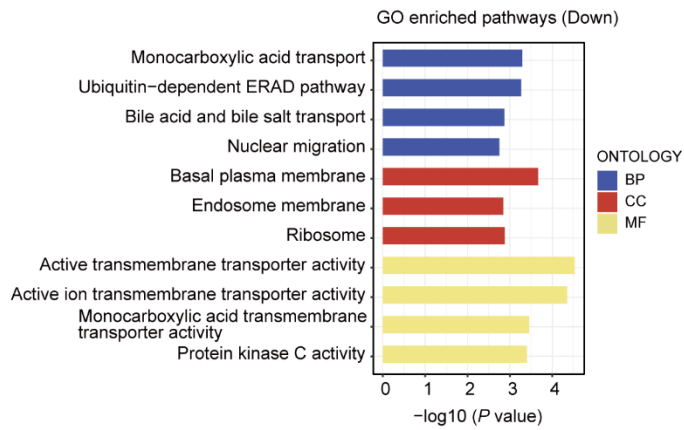

**Supplementary Data 2 | Phosphoproteomic analysis of primary hepatocytes from WT and WDR6-WKO mice, related to Fig. 4.**

**a.** The number of identified (blue), quantified (green) and quantitatively different (red) phosphorylation sites. **b.** GO enrichment analysis of proteins with increased levels of phosphorylation in WDR6-WKO vs. WT groups. **c.** GO enrichment analysis of proteins with lower levels of phosphorylation in WDR6-WKO vs. WT groups.

Supplementary Data 3

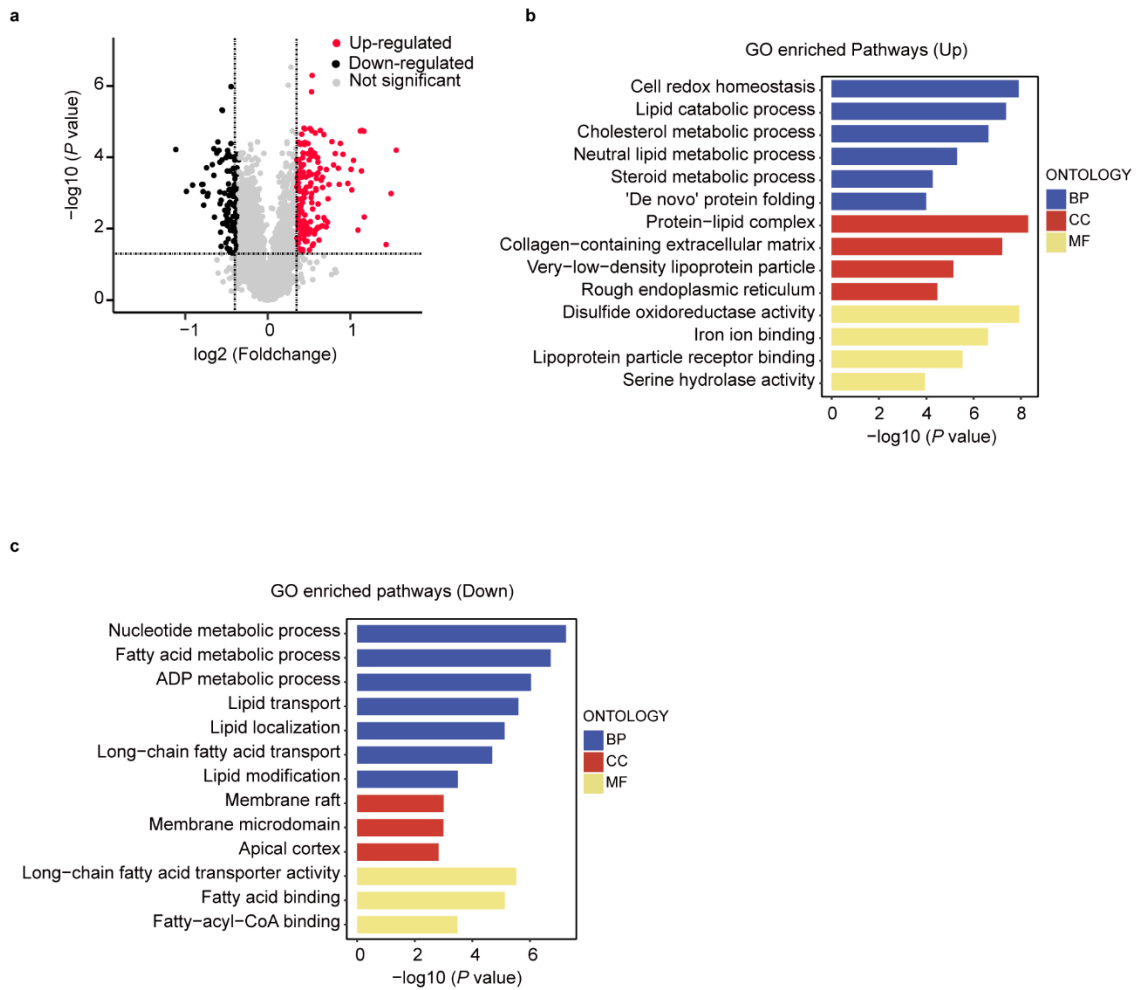

**Supplementary Data 3 | Proteomic analysis of differentially expressed proteins in primary hepatocytes from WT and WDR6-WKO mice, related to Fig. 4.**

**a.** A volcano plot showing differentially expressed proteins. Red, increased overall levels; black, lower levels, gray, no significant difference. **b.** GO enrichment analysis of proteins increased in WDR6-WKO vs. WT groups. **c.** GO enrichment analysis of proteins decreased in WDR6-WKO vs. WT groups.

#### Supplementary Data 4

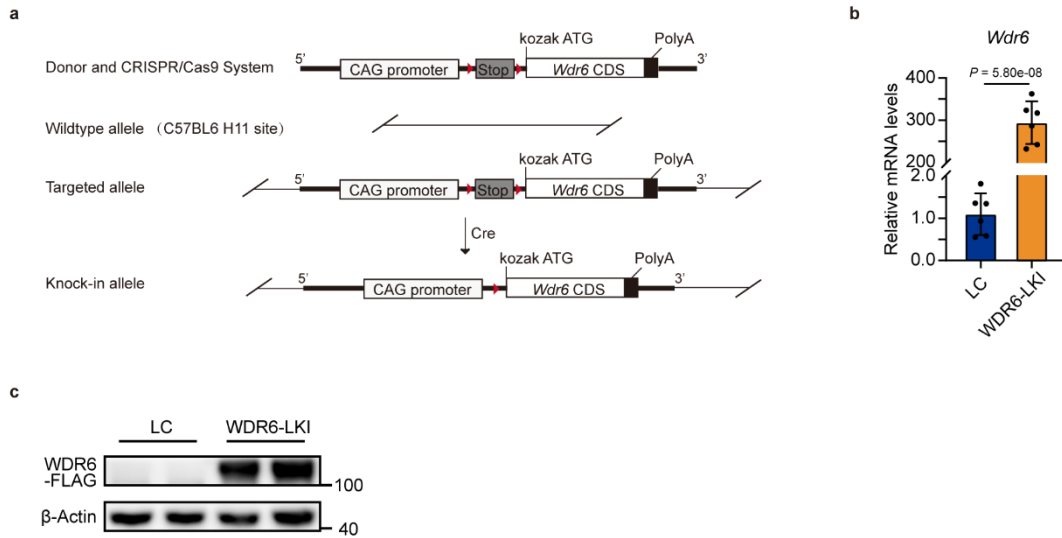

#### Supplementary Data 4 | WDR6-LKI mice were created and show liver specific overexpression of *Wdr6*, related to Fig. 4.

**a.** A schematic diagram illustrating the strategy for creating WDR6-LKI mice. **b.** RT-PCR analysis of *Wdr6* mRNA levels in livers of LC and WDR6-LKI mice. Expression of *Wdr6* was normalized to *Actb* mRNA levels.  $n = 6$  biologically independent mice per group. **c.** Western blots of WDR6-FLAG protein levels in livers of LC and WDR6-LKI mice.  $n = 4$  biologically independent mice per group.  $\beta$ -Actin serves as a loading control. Data in (b) are presented as mean  $\pm$  SD and analyzed by unpaired two-sided Student's *t*-test.



Supplementary Data 5

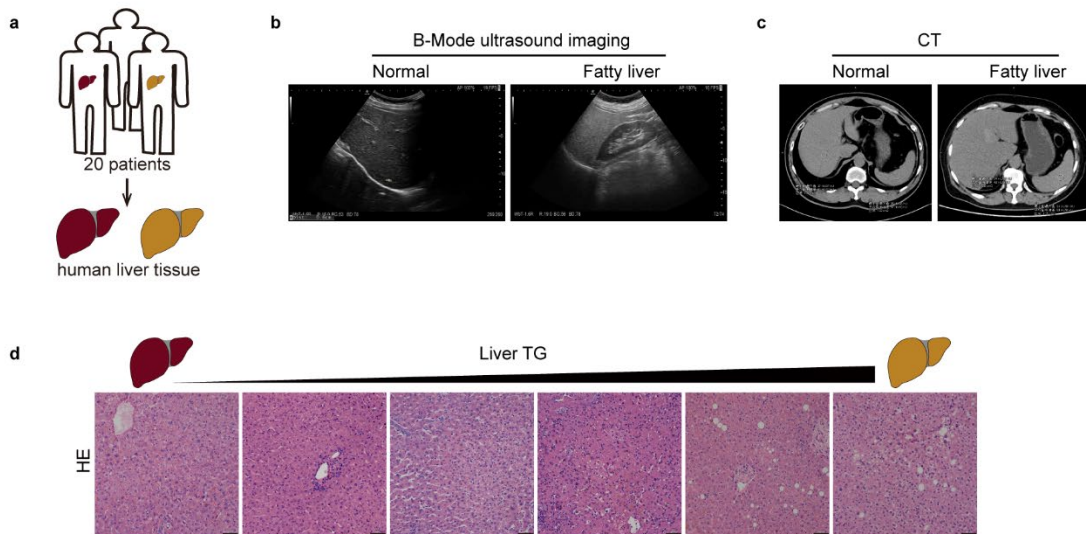

**Supplementary Data 5 | The correlation of WDR6, FASN and TAG levels in human liver tissue, related to Fig. 7.**

**a.** Schematic diagram illustrating the collection of human liver samples with different degrees of hepatic lipid deposition. **b.** Representative liver B-Mode ultrasound imaging of the above patients. **c.** Representative liver computed tomography (CT) imaging of the above patients. **d.** Representative H&E staining of liver sections of the above patients. Scale bars, 50 μm.

**Supplementary Data 6 | Primer sequences for genotyping the genetically modified mice and cells.**

---

| mice/ cells                            | Forward primer (5'-3')                                                                                |
|----------------------------------------|-------------------------------------------------------------------------------------------------------|
| Wdr6 whole-body knockout mice          | F: CTGTCTAGGCGAGGGGCCTGAT<br>R: GTCGAGTATCCTGTGGGCCACCT                                               |
| Srebp1c whole-body knockout mice       | F: ATCGGCGCGGAAGCTGGGGTAGCGTCT<br>R1: TCTCCAGATTTATGCAGGTCATAAATAGTAC<br>R2: GCTCAGTTCGAGGTGCTGTTTCTG |
| Usf1 whole-body knockout mice          | F: CGTTACAGATAGTTGTGAGCCACC<br>R: CTCTATCCCTTAGCAGAACACCATG                                           |
| Hepatocyte-specific Wdr6 knockout mice | F: TCTGTTGAGCCTCAGGGATTAGACTG<br>R: ACCTCAACTGCAAAGGCACACT<br>F1: ATGCCACCAAAGTCATCAGTGTAG            |
| Wdr6 knockin flox/flox mice            | R1: AGGCGGGCCATTTACCGTAAGTTA<br>F2: AGTCTTTCCCTTGCCTCTGCT<br>R2: GGGTCTTCCACCTTTCTTCAG                |
| WDR6-Flag HepG2 cells                  | F: ATCTCTGTTATTGACCAGGCTGTC<br>R1: CTTGTCATCGTCATCCTTGTAATC<br>R2: CTGTCTTGTCATGGGGAGTCG              |

---

**Supplementary Data 7 | Primer sequences for adenoviral and adeno-associated viral plasmid construction.**

| Gene               | Vector                   | Forward primer (5'-3') | Reverse primer (5'-3') |
|--------------------|--------------------------|------------------------|------------------------|
| Ad-mWDR6           | CMV-MCS-3*FLAG-SV40-EGFP | AGGTCGACTCTAG          | TCCTTGTAGTCCAT         |
|                    |                          | AGGATCCCGCCAC          | ACCGGTGTCATACC         |
|                    |                          | CATGGACGCTTTC          | AGTTGTAAACCTCA         |
|                    |                          | GGGGACTATGTCTGG        | AGTCC                  |
| AAV-mPPP1CB (316D) | TBG-3*FLAG-P2A-ZSGREEN   | GCCACCATGGCGG          | CCTTTTCTTCGGTG         |
|                    |                          | ACGGGGAGCT             | GATTAGCTGTTCGA         |
|                    |                          |                        | GGCGGATCGACAGGACGT     |

**Supplementary Data 8 | Primer sequences for constructing overexpression plasmids.**

| Gene                            | Forward primer (5'-3')                                                  | Reverse primer (5'-3')                                                       |
|---------------------------------|-------------------------------------------------------------------------|------------------------------------------------------------------------------|
| hWDR6-FLAG                      | ATGGGCAGCGCGGCG<br>CGCTGG                                               | TTGAGGTTTACAACCTGGT<br>ATGAC                                                 |
| hWDR6-HA                        | ACGGGCCCTCTAGACT<br>CGAGCGCCACCATGT<br>ACCCTTATGATGTCCC<br>AGACTATGCTGG | TTAAACTTAAGCTTGGTA<br>CCTCAGTCATACCAGTTG<br>TAAACCTCAAGC                     |
| hWDR6<br>(1-329aa)              | GAAAACCTGTATTTTC<br>AGGGCATGGACGCTC<br>TCGAGGACTACG                     | TCGAGGCTGATCAGCGGG<br>TTTCATTACCCTACCAAGT<br>GCCACAGCCG                      |
| hWDR6<br>(334-687aa)            | GAAAACCTGTATTTTC<br>AGGGCGGATTGGGGG<br>TCTCGGCTCTC                      | TCGAGGCTGATCAGCGGG<br>TTTCATTAGCCACCCAGA<br>GCCCTGTACAGC                     |
| hWDR6<br>(698-1121aa)           | GAAAACCTGTATTTTC<br>AGGGCGGTCTGCATG<br>GCCGTGAGATCAC                    | TCGAGGCTGATCAGCGGG<br>TTTCATTAGTCATACCAGT<br>TGTAACCTC                       |
| hWDR6<br>(1-699aa)              | GAAAACCTGTATTTTC<br>AGGGCATGGACGCTC<br>TCGAGGACTACG                     | TCGAGGCTGATCAGCGGG<br>TTTCATTACAGACCCTCCC<br>GGAGAATCACG                     |
| hWDR6<br>(1-311,<br>687-1121aa) | GAAAACCTGTATTTTC<br>AGGGCATGGACGCTC<br>TCGAGGACTACG<br>TCTCGGCTCTCTGCGC | TCGAGGCTGATCAGCGGG<br>TTTCATTAGTCATACCAGT<br>TGTAACCTC<br>TCGAGGCTGATCAGCGGG |
| hWDR6-mut<br>(AKSASA)           | TGCATCCGCCAGTGCG<br>CCAGGTACACTCAAG<br>GCTGTG                           | TTTCATTAGCCACCCAGA<br>GCCCTGTACAGC                                           |
| hPPP1CB-FLAG                    | GACCCAAGCTGGCTA<br>GTTGAATTCGCCACC                                      | TCACTTAAGCTTGGTACC<br>GAGGATCC                                               |
| hPPP1CB-HA                      | TACCCCTATGACGTGC<br>CAGAC                                               | TGCGTAGTCTGGAACGTC<br>GTA                                                    |
| hPPP1CB (316A)-<br>FLAG         | GAATTCGCCACCATG<br>GCGGACGGGGAGCT                                       | GCGGATTAGCTGTTCGAG<br>GTGGAGCGACAGGACGTC<br>CAGAATTCAG                       |
| hPPP1CB (316D)-<br>FLAG         | GAATTCGCCACCATG<br>GCGGACGGGGAGCT                                       | CGGATTAGCTGTTCGAGG<br>TGGATCGACAGGACGTCC<br>AGAATTCAG                        |

**Supplementary Data 9 | Primer sequences for RT-PCR.**

| Gene                          | Species | Forward primer (5'-3')       | Reverse primer (5'-3')       |
|-------------------------------|---------|------------------------------|------------------------------|
| <i>Acadm</i>                  | mouse   | AGGGTTTAGTTTTGAGT<br>TGACGG  | CCCCGCTTTTGTTCATATT<br>CCG   |
| <i>Acc1</i>                   | mouse   | GCTTATTGATCAGTTAT<br>GTGGCC  | CTGCAGGTTCTCAATGC<br>AAA     |
| <i>Acox1</i>                  | mouse   | TAACTTCCTCACTCGAA<br>GCCA    | AGTTCCATGACCCATCT<br>CTGTC   |
| <i>Acox2</i>                  | mouse   | CCAGCACTTTGAGGAG<br>GAGA     | GGACTTGGCTTCCTTTA<br>GGG     |
| <i>ApoB</i>                   | mouse   | AAGCACCTCCGAAAGT<br>ACGTG    | CTCCAGCTCTACCTTAC<br>AGTTGA  |
| <i>Cd36</i>                   | mouse   | AAGCAAAGTTGCCATA<br>ATTGAGTC | GGAAAGGAGGCTGCGT<br>CTG      |
| <i>ChREBP</i>                 | mouse   | AGATGGAGAACCGACG<br>TATCA    | ACTGAGCGTGCTGACAA<br>GTC     |
| <i>Colla1</i>                 | mouse   | TGCTAACGTGGTTCGTG<br>ACCGT   | ACATCTTGAGGTCGCGG<br>CATGT   |
| <i>Col3a1</i>                 | mouse   | ACGTAAGCACTGGTGG<br>ACAG     | CCGGCTGGAAAGAAGT<br>CTGA     |
| <i>Cpt1a</i>                  | mouse   | TTGGGCCGGTTGCTGAT            | GTCTCAGGGCTAGAGAA<br>CTTGGA  |
| <i>Cpt2</i>                   | mouse   | CAGCACAGCATCGTAC<br>CCA      | TCCCAATGCCGTTCTCA<br>AAAT    |
| <i>Ctgf</i>                   | mouse   | TGACCCCTGCGACCCA<br>CA       | TACACCGACCCACCGAA<br>GACACAG |
| <i>Fabp1</i>                  | mouse   | ATGAACTTCTCCGGCA<br>AGTACC   | CTGACACCCCCTTGATG<br>TCC     |
| <i>Fasn</i>                   | mouse   | GTCTGGGAGGAATGT<br>AAACAG    | CGGATCACCTTCTTGAG<br>AGC     |
| <i>G6pc</i>                   | mouse   | ACTAAAGCCTCTGAAA<br>CCC      | AGATTCTGCACCGCAAG            |
| <i>Glut2</i>                  | mouse   | TCAGAAGACAAGATCA<br>CCGGA    | GCTGGTGTGACTGTAAG<br>TGGG    |
| <i>hadha</i>                  | mouse   | TGCATTTGCCGCAGCTT<br>TAC     | GTTGGCCCAGATTTTCGT<br>TCA    |
| <i>Il-1<math>\beta</math></i> | mouse   | CCGTGGACCTTCCAGG<br>ATGA     | GGGAACGTCACACACC<br>AGCA     |
| <i>Il-6</i>                   | mouse   | TAGTCCTTCTACCCCA<br>ATTTCC   | TTGGTCCTTAGCCACTC<br>CTTC    |
| <i>Insr</i>                   | mouse   | ATGGGCTTCGGGAGAG<br>GAT      | GGATGTCCATACCAGGG<br>CAC     |

|                                |       |                                |                             |
|--------------------------------|-------|--------------------------------|-----------------------------|
| <i>Lipe</i>                    | mouse | CCAGCCTGAGGGCTTA<br>CTG        | CTCCATTGACTGTGACA<br>TCTCG  |
| <i>Mtp</i>                     | mouse | CTCTTGGCAGTGCTTTT<br>TCTCT     | GAGCTTGTATAGCCGCT<br>CATT   |
| <i>Pck1</i>                    | mouse | GCATAACGGTCTGGAC<br>TTCT       | TGATGACTGTCTTGCTTT<br>CG    |
| <i>Pnpla2</i>                  | mouse | GGATGAAAGAGCAGAC<br>GGGTAG     | CGCAAGACAGTGGCAC<br>AGAG    |
| <i>Scd1</i>                    | mouse | AAGATATTCACGACCC<br>CACC       | CAGCCGTGCCTTGTAAG<br>TTC    |
| <i>Srebplc</i>                 | mouse | GCGCTACCGGTCTTCTA<br>TCA       | GGATGTAGTCGATGGCC<br>TTG    |
| <i>Tnf-<math>\alpha</math></i> | mouse | CATCTTCTCAA AATTCG<br>AGTGACAA | TGGGAGTAGACAAGGT<br>ACAACCC |
| <i>Wdr6</i>                    | mouse | GGGATCTCACCACGGC<br>AATG       | AAGGTCAGCCGCTGGTC<br>TATG   |
| <i><math>\alpha</math>-Sma</i> | mouse | CCCAGACATCAGGGAG<br>TAATGG     | TCTATCGGATACTTCAG<br>CGTCA  |

---

### Supplementary Data 10 | Antibodies used for western blots.

| Antibodies                                      | Source                    | Identifier                        |
|-------------------------------------------------|---------------------------|-----------------------------------|
| Mouse-anti-phospho-AKT (Ser473), dil:1/1000     | Cell Signaling Technology | Cat# 12694; RRID AB_2797994       |
| Rabbit-anti-AKT, dil:1/1000                     | Cell Signaling Technology | Cat# 9272; RRID AB_329827         |
| Rabbit-anti-FASN, dil:1/2000                    | Cell Signaling Technology | Cat# 3180; RRID AB_2100796        |
| Rabbit-anti-phospho-ACC (Ser79), dil:1/1000     | Cell Signaling Technology | Cat# 11818; RRID AB_2687505       |
| Rabbit-anti-ACC, dil:1/1000                     | Cell Signaling Technology | Cat# 3676; RRID AB_2219397        |
| Rabbit-anti-CPT1A, dil:1/1000                   | Cell Signaling Technology | Cat# 12252; RRID AB_2797857       |
| Rabbit-anti-HA, dil:1/1000                      | Cell Signaling Technology | Cat# 3724; RRID AB_1549585        |
| Rabbit-anti-WDR6, dil:1/1000                    | Origene                   | Cat# TA322298; RRID AB_2924343    |
| Mouse-anti-PPP1CA, dil:1/1000                   | Novus                     | Cat# NBP1-51600; RRID AB_11027838 |
| Rabbit-anti-PPP1CC, dil:1/1000                  | Novus                     | Cat# NBP1-32858; RRID AB_2168096  |
| Rabbit-anti-phospho-DNA-PK (Thr2609), dil:1/500 | Novus                     | Cat# NBP1-02456; RRID AB_1522176  |
| Mouse-anti-DNA-PK, dil:1/500                    | Novus                     | Cat# NBP2-22128; RRID AB_2910254  |
| Mouse-anti-βActin, dil:1/7500                   | Proteintech               | Cat# CL594-66009; RRID AB_2883475 |
| Rabbit-anti-CD36, dil:1/1000                    | Proteintech               | Cat# 18836-1-ap; RRID AB_10597244 |
| Rabbit-anti-FLAG, dil:1/1000                    | Proteintech               | Cat# 20543-1-AP; RRID AB_11232216 |
| Mouse-anti-GAPDH, dil:1/7500                    | Proteintech               | Cat# 60004-1-Ig; RRID AB_2107436  |

|                                                                               |                                   |                                          |
|-------------------------------------------------------------------------------|-----------------------------------|------------------------------------------|
| Mouse-anti-Lamin B1, dil:1/5000                                               | Proteintech                       | Cat# 66095-1-Ig;<br>RRID<br>AB_11232208  |
| Mouse-anti-SREBP1, dil:1/500                                                  | abcam                             | Cat# ab3259;<br>RRID AB_303650           |
| Rabbit-anti-PPP1CB, dil:1/2000                                                | abcam                             | Cat# ab53315;<br>RRID<br>AB_2168274      |
| Rabbit-anti-USF1, dil:1/1000                                                  | OriGene                           | Cat# TA327163;<br>RRID<br>AB_2910255     |
| Mouse-anti- $\alpha$ SMA, dil:1/1000                                          | abcam                             | Cat# ab7817;<br>RRID AB_262054           |
| Rabbit-anti-phospho-PPP1CB<br>(Thr316), dil:1/500                             | This paper                        | N/A                                      |
| Peroxidase-AffiniPure Goat Anti-<br>Mouse IgG (H + L) antibody,<br>dil:1/5000 | Jackson<br>ImmunoResearch<br>Labs | Cat# 115-035-003;<br>RRID<br>AB_10015289 |
| Peroxidase-AffiniPure Goat Anti-<br>Rabbit IgG (H+L) antibody, dil:1/5000     | Jackson<br>ImmunoResearch<br>Labs | Cat# 111-035-003;<br>RRID<br>AB_2313567  |

---
