# Supplementary material for: Upregulation of WDR6 drives hepatic de novo lipogenesis in insulin resistance in mice
Source: PubMed Central journal article supplement (PMC10590755; doi:10.1038/s42255-023-00896-7), 2023-09-21
Supplement: 42255_2023_896_MOESM4_ESM.pdf [file 42255_2023_896_MOESM4_ESM.pdf]

Supplementary Data 4c

kDa

100

70

55

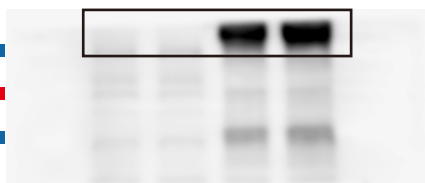

WDR6-FLAG

40

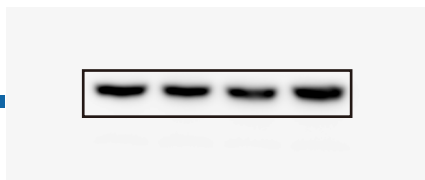

$\beta$ -Actin
