# Supplementary material for: Upregulation of WDR6 drives hepatic de novo lipogenesis in insulin resistance in mice
Source: PubMed Central journal article supplement (PMC10590755; doi:10.1038/s42255-023-00896-7), 2023-09-21

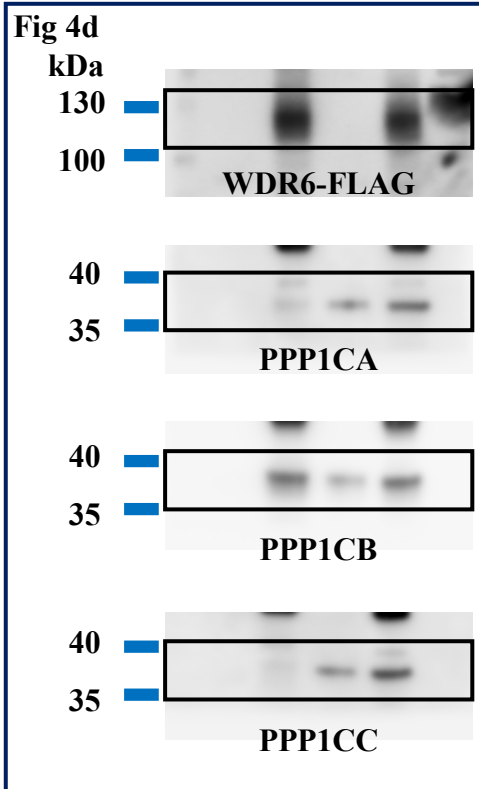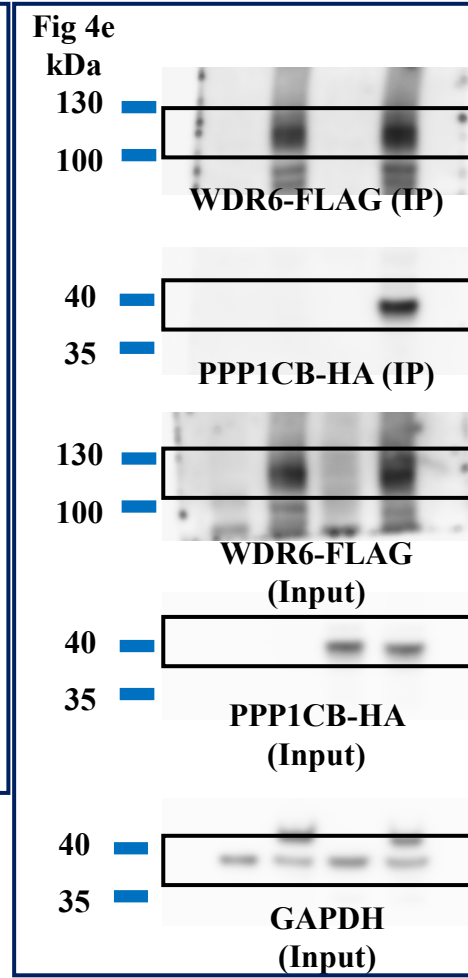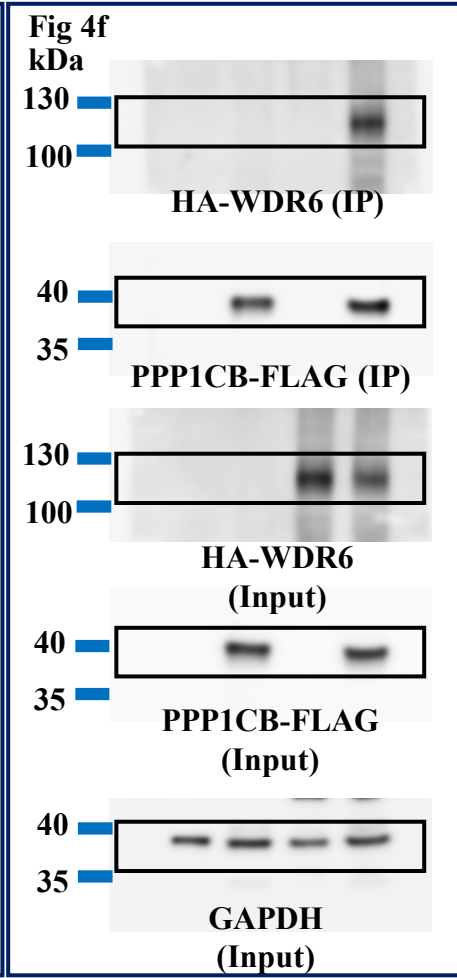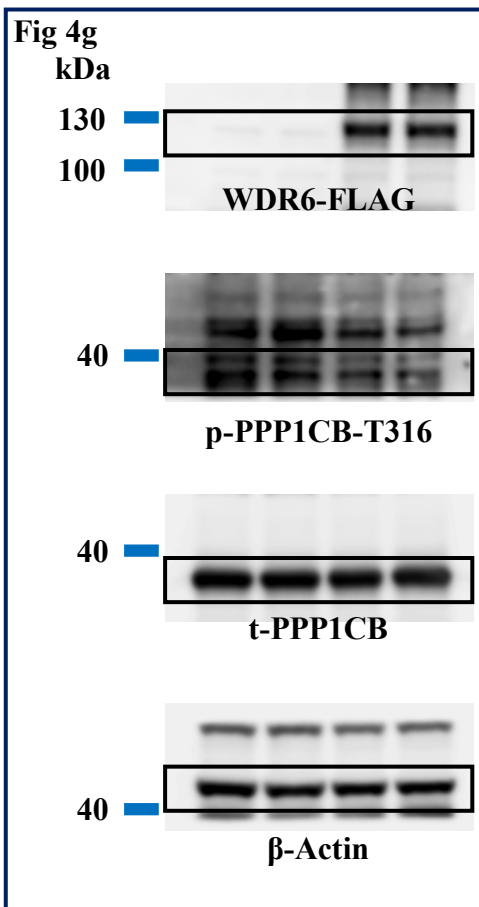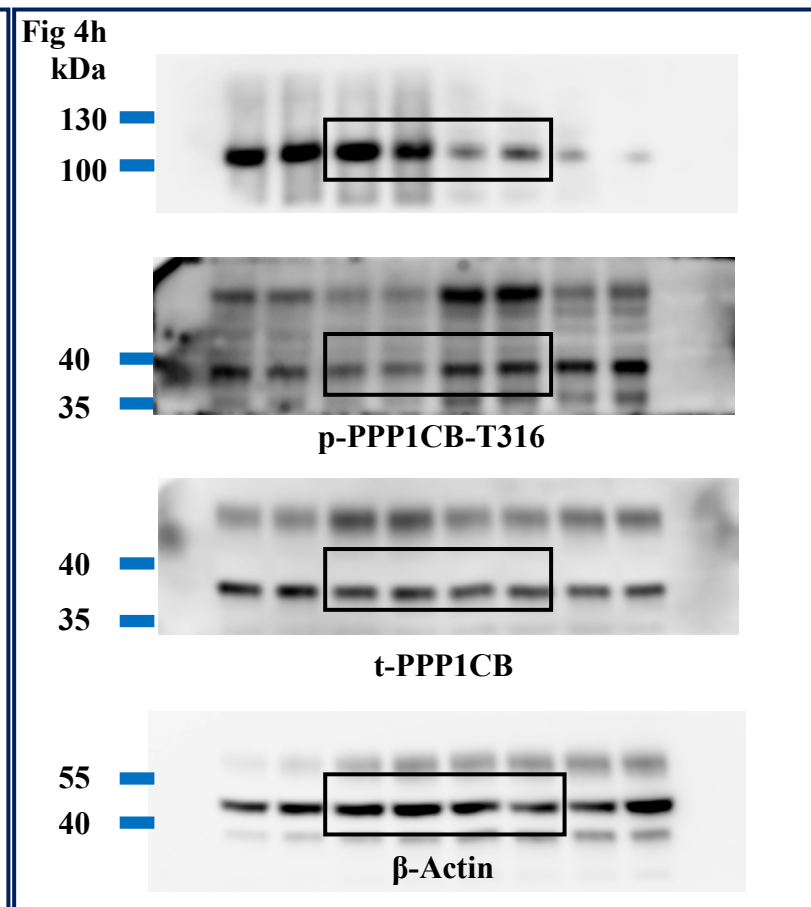

**Fig 4i**

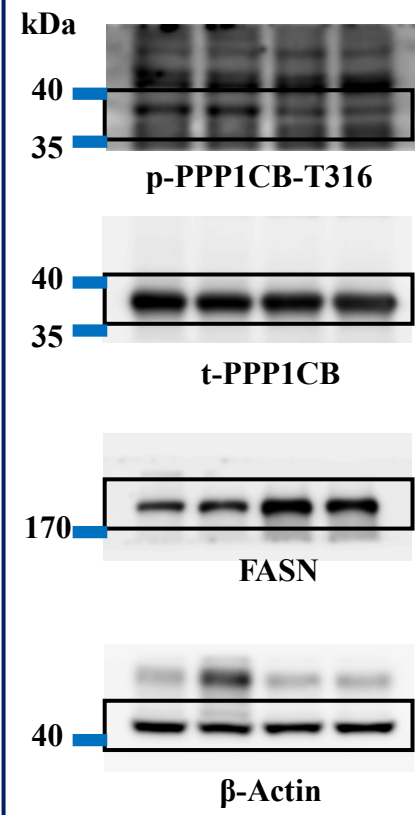

**Fig 4j**

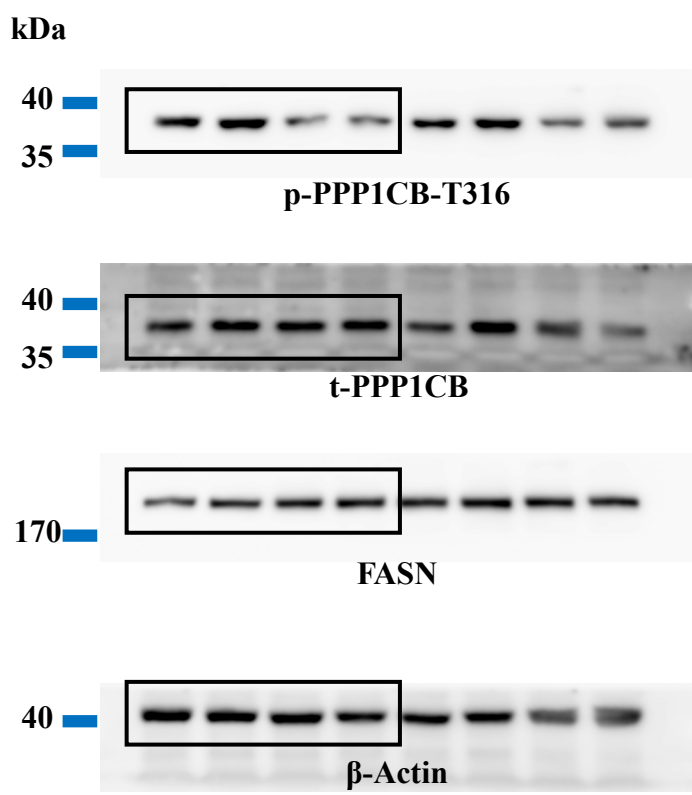

**Fig 4k**

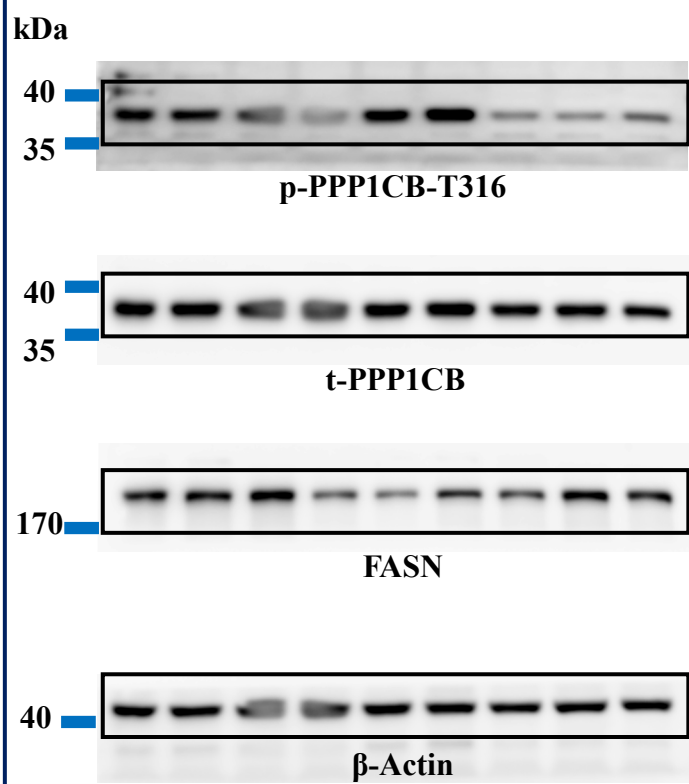

Supplement: 42255_2023_896_MOESM11_ESM.pdf [file 42255_2023_896_MOESM11_ESM.pdf]
