# Supplementary material for: Upregulation of WDR6 drives hepatic de novo lipogenesis in insulin resistance in mice
Source: PubMed Central journal article supplement (PMC10590755; doi:10.1038/s42255-023-00896-7), 2023-09-21

Extended Data Fig. 10b

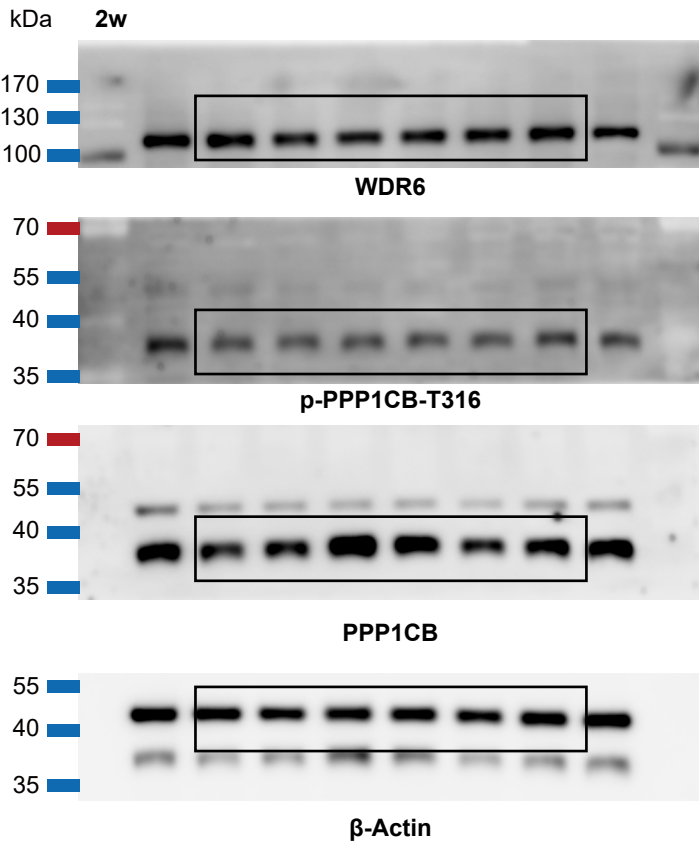

Extended Data Fig. 10b

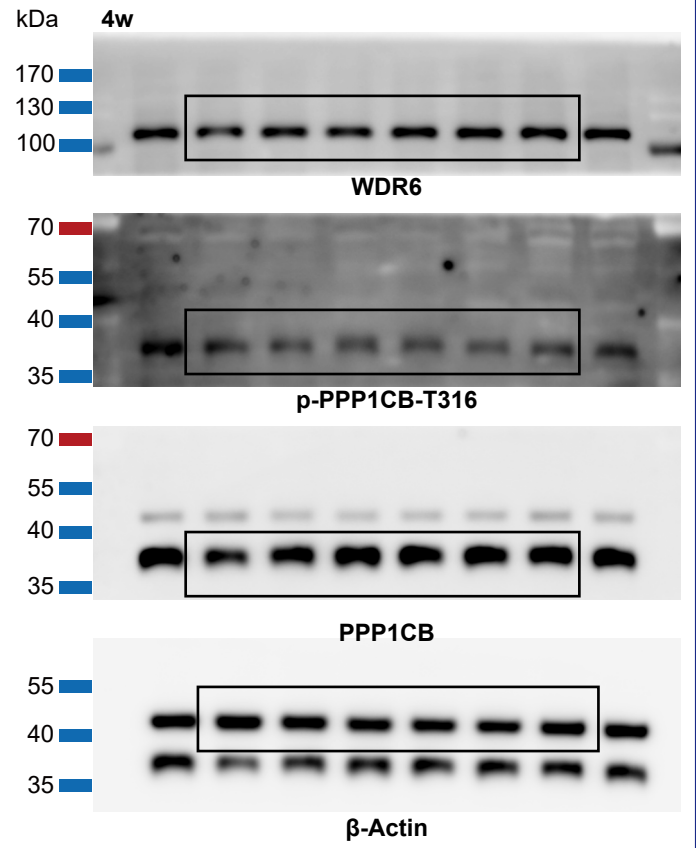

Extended Data Fig. 10b

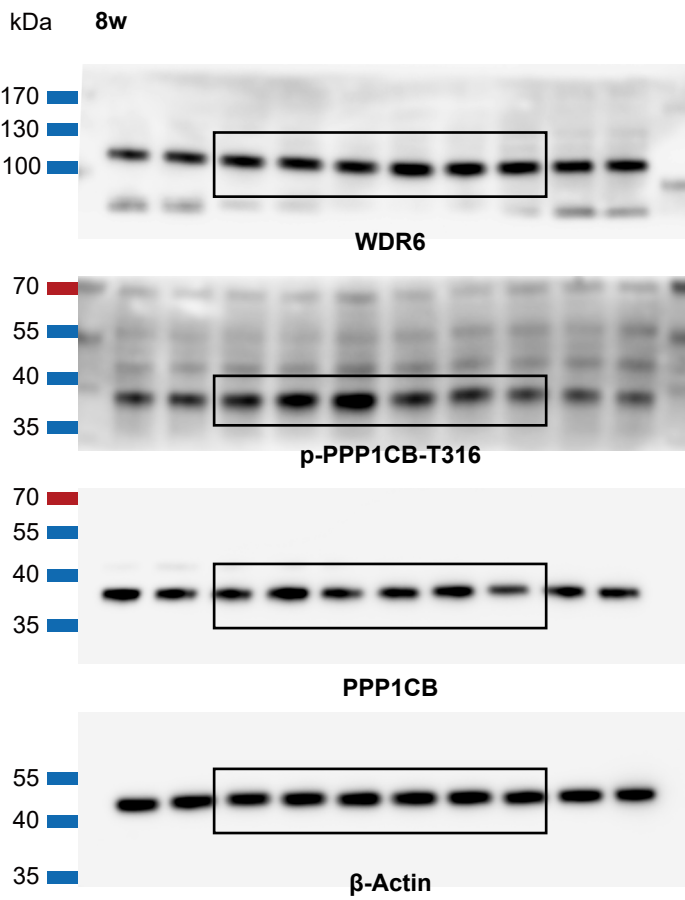

Extended Data Fig. 10b

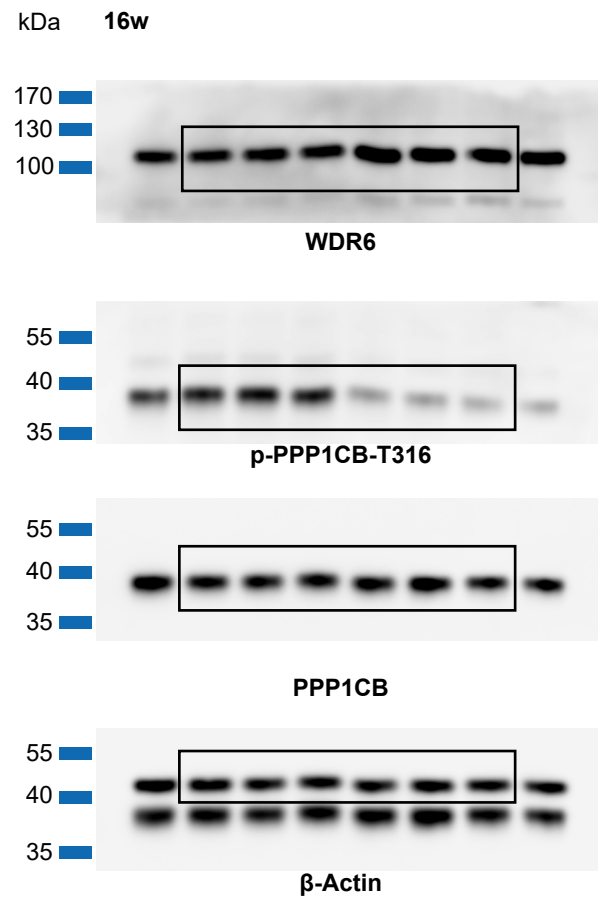

Supplement: 42255_2023_896_MOESM33_ESM.pdf [file 42255_2023_896_MOESM33_ESM.pdf]
